# Supplementary material
Source: PubMed Central journal article supplement (PMC1201283)

Figure S1

**A**

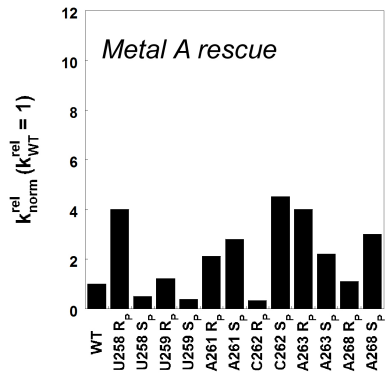

**B**

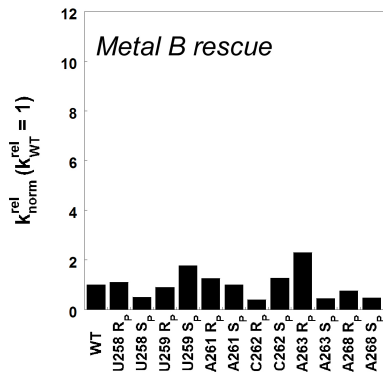

**C**

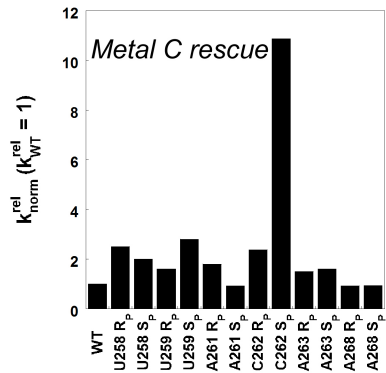

Supplement: pbio.0030277.sg001.pdf [file pbio.0030277.sg001.pdf]

Figure S2

A

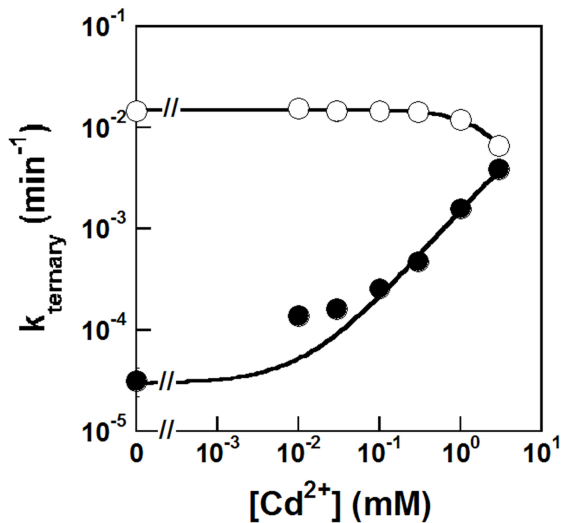

B

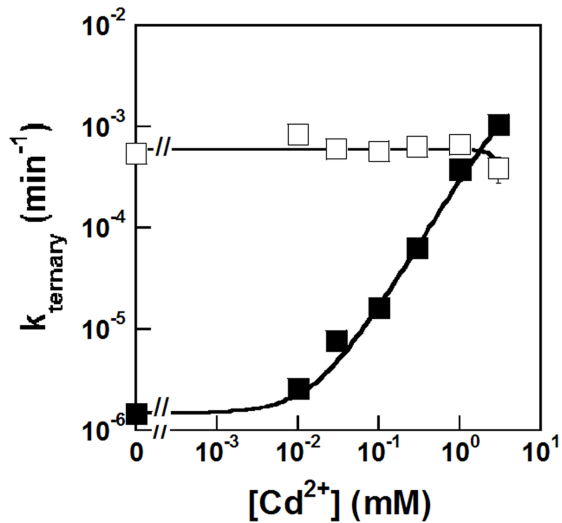

Supplement: pbio.0030277.sg002.pdf [file pbio.0030277.sg002.pdf]

Figure S3

A

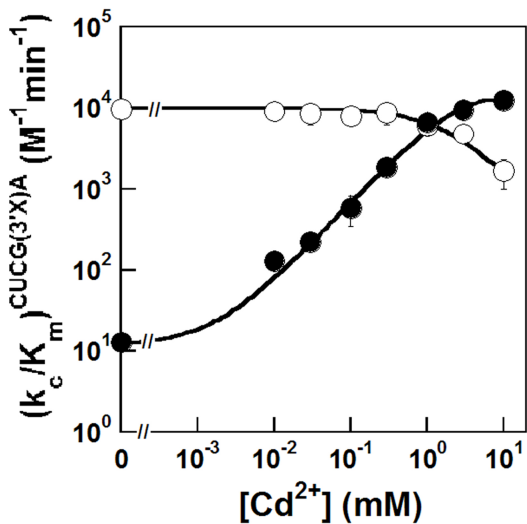

B

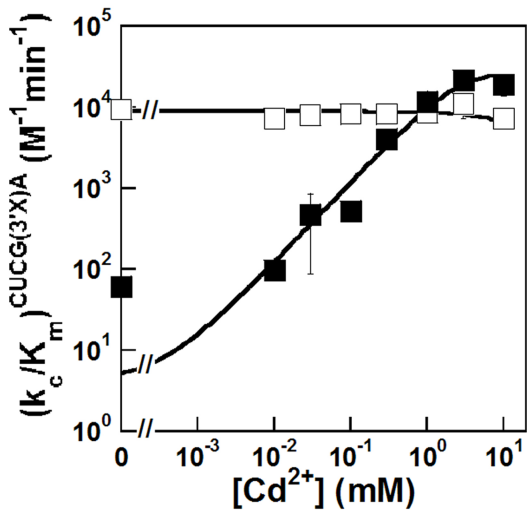

Supplement: pbio.0030277.sg003.pdf [file pbio.0030277.sg003.pdf]

Figure S4

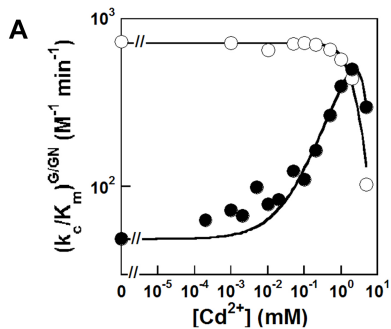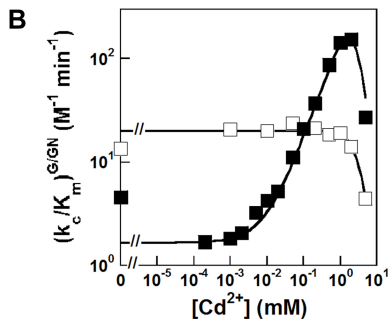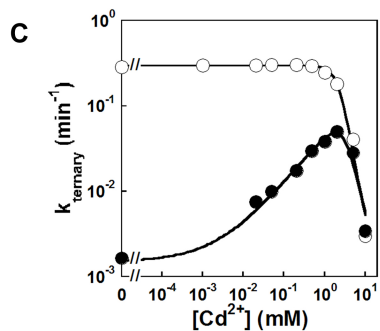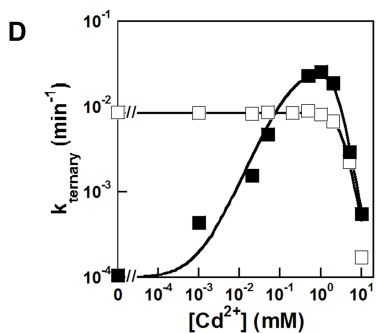

Supplement: pbio.0030277.sg004.pdf [file pbio.0030277.sg004.pdf]

Figure S5

A

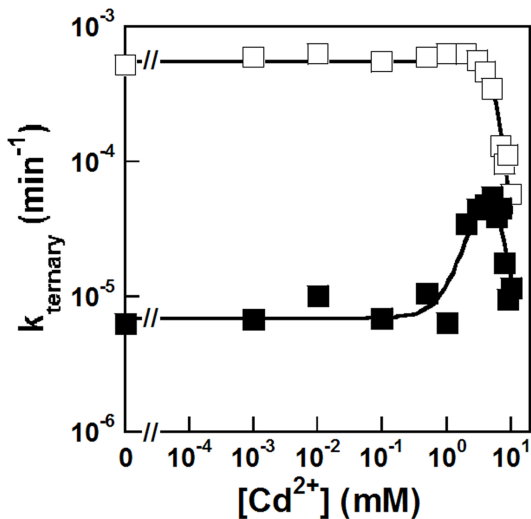

B

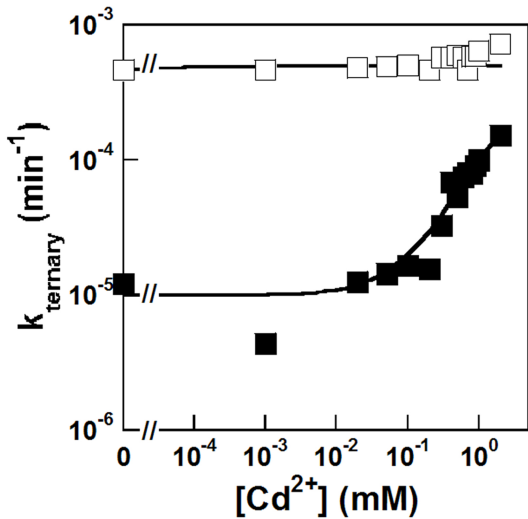

Supplement: pbio.0030277.sg005.pdf [file pbio.0030277.sg005.pdf]
